# Supplementary material for: Evaluating Expectations on Museum Communication about Geo- and Environmental Sciences
Source: Copernicus journal article supplement (doi:10.5194/egusphere-2024-2567), 2024-10-02
Supplement: Supplementary file [file egusphere-2024-2567-RC1-supplement.pdf]

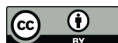

# 1 Evaluating Expectations on Museum Communication about 2 Geo- and Environmental Sciences

3

4 Simon Schneider<sup>1\*</sup>, Lina Seybold<sup>1</sup>, Malte Junge<sup>2</sup>, Melanie Kaliwoda<sup>2</sup>, Gilla Simon<sup>2</sup>, Martina  
5 Kölbl-Ebert<sup>1</sup>

6 <sup>1</sup>Ludwig-Maximilians-Universität München (LMU), Fakultät für Geowissenschaften, Luisenstr. 37, 80333 München, Germany.

7 <sup>2</sup>Staatliche Naturwissenschaftliche Sammlungen Bayerns (SNSB), Bayerische Staatssammlung für Paläontologie und Geologie, Richard-Wagner-Str. 10, 80333 München,  
8 Germany

9 \*corresponding author: simon.schneider1@lmu.de

10

## 11 Abstract

12 In order to design an exhibition on earth and environmental science research, we conducted an online  
13 survey on the thematic interests of potential future visitors. The 775 valid responses we received were used to  
14 analyse the level of interest in predefined subject areas. In addition, further topics were extracted from open  
15 questions that were mentioned by the survey participants as being particularly interesting. The analysis of these  
16 interest levels in relation to the socio-demographic distribution of the participants provides an indication of  
17 which topics should be discussed in a future exhibition. The data also allows conclusions to be drawn about the  
18 development of strategic communication concepts. These will be able to support the processes from initial  
19 contact through to a participatory dialog. It is also of particular interest that the data obtained in this survey  
20 allows the hypothesis that topics for which the participants indicated a low level of interest may not actually be  
21 uninteresting, but rather result from a lack of prior knowledge. The study presented here therefore leads to the  
22 conclusion that such topics should be addressed in communication with visitors to an exhibition in order to build  
23 up prior knowledge and increase interest in these topics.

24 *Keywords: science communication, expectation, museum, exhibition, topical relevance*

## 25 1. Introduction

26 Museums fulfil various functions: They collect, preserve, research and communicate, according to the  
27 German Museums Association (DMB) in its guidelines for museums (DMB 2006) and others (e.g. Kirchberg 2016,  
28 who is quite critical of this). Sheng & Cheng (2012) also observe that museums ‘... gradually acquired visitor-  
29 based roles instead of museum-based roles.’ From this new, visitor-centred self-image follows an increasing need  
30 to analyse the visitors themselves – what they expect from the museum, what experiences they associate with  
31 museums and how mediated content is received by visitors. The study presented here deals with the first point  
32 mentioned: the analysis of visitors' expectations of an exhibition. To this end, we concentrate on content-related  
33 expectations, although we also asked about expectations regarding other elements of the ‘experience’ (Liu 2008).  
34 In fact, in addition to Höller (1983), we also see the fulfilment of content expectations as a criterion for a  
35 experience.



36 The reason for conducting this study is ~~based on the idea of~~ integrating visitors' expectations into the  
37 exhibition design and concept as early as possible. The usual approach to developing an exhibition is for a team  
38 of exhibition experts to discuss possible content with scientists, consider ways of communicating it and then design  
39 exhibits, audio-visual content, texts, images and graphics. ~~This is an exaggerated and simplified depiction of a~~  
40 ~~thoroughly complex process. Nevertheless,~~ the approach of defining themes and content from within, i.e. from the  
41 curatorial team or directly from academia, remains dominant in most cases. ~~This does not necessarily have to be~~  
42 ~~problematic. However, it often~~ means that the topics that are actually interesting or relevant for visitors are not  
43 taken into account. Instead – analogous to the gatekeeper function of journalism (Lippman 1998) – a research-  
44 centred decision is made as to which topics are communicated.

45 As part of the conception of a new exhibition on geosciences and environmental sciences, which is being  
46 jointly designed by the Bavarian Natural History Collections (SNSB) and the Ludwig-Maximilians-Universität  
47 München (LMU), the conception team has chosen a different approach. Although topics defined by the main  
48 research areas at the partner institutions are still addressed in the educational programs, the concept also aims to  
49 provide space for topics and content that are chosen according to the expectations and interests of the visitors  
50 themselves (cf. Liu 2008). The aim is to merge existing, more traditional exhibition concepts into a new integrative  
51 and modern mediation concept (Thiemeyer 2016). The mission is to take up the concept of the forum and create  
52 an open, transparent space that invites participation and enables active engagement with the earth and  
53 environmental sciences through presentation and dialog. To achieve this, visitors must be motivated to think for  
54 themselves, to question critically and to develop new strategies for action and decision-making. This can be  
55 achieved if suitable topics based on the intrinsic interest of the visitors are proactively available and presented. In  
56 order to find these topics, an online survey was conducted in summer 2021 to identify these areas of interest. Clear  
57 thematic preferences were identified from the 775 valid responses<sup>1</sup>. By combining the analysis of socio-  
58 demographic data with content-related information from the participants, it was also possible to identify  
59 approaches that will allow a target group-specific approach. This will enable the GeoForum2 concept team to  
60 develop a strategic communication concept.

## 61 2. Theoretical background

62 In the empirical social sciences, qualitative content analysis (QCA) and multivariate statistics are now  
63 established tools for analysing the attitudes and expectations of specific target groups (see Schnell et al. 2011). On  
64 the basis of surveys (in-person, written, online, audio-visual), samples of the relevant target groups are approached  
65 and interviewed. In combination with socio-demographic information, correlations between, for example, age and  
66 interest in certain topics can be interpreted. QCA becomes more complex if, in addition to the scalable information  
67 from closed questions (e.g. via Likert scales or others), open questions are also to be included in the analysis. The

---

<sup>1</sup> The responses are provided with ID numbers up to 784. However, some responses were not included in the evaluation because they were incomplete. Therefore, only 775 responses are included in the following analysis.

<sup>2</sup> Ludwig-Maximilians-Universität München (LMU) and the Bavarian State Natural History Collections (SNSB) are currently working on an innovative exhibition concept that will move into the new Geo-Campus to be built in the center of Munich in the next few years. The exhibition will be called GeoForum and will present current geoscientific research and also serve as a communication partner for the public on topics relating to earth and environmental sciences.



68 analysis and interpretation of such open questions require the coding of answers, which then allow a quantitative-  
69 qualitative statement to be made about the corresponding questions. A combination of closed and open questions  
70 was used in this study.

## 71 2.1 Problems of operationaliz

72 Especially when using simple Likert scales, it can be observed that a so-called ‘central tendency bias’  
73 (CTB; Hollingworth 1910) occurs in self-assessments and queries about interest or expectations. According to  
74 Xiang et al. (2021), the CTB is a ‘... well-known empirical regularity that perceptual judgments are biased towards  
75 the centre of the stimulus distribution.’ This means that survey participants are more likely to give a mean value  
76 as a result than a value in the extreme ranges of the Likert scale. The tendency towards the centre results in a  
77 reduction in variance - it must therefore ~~always~~ be taken into account in the statistical analysis.

78 In addition to the tendency towards the middle, ‘social-desirability response bias’ (SDRB) ~~also comes~~  
79 ~~into play~~ (Gordon 1951, or more recent Bernardi & Nash 2023) when attitudes are asked about in a wider social  
80 context. Especially when the sender of the survey is seen as dominant or very competent by the participants,  
81 answers are given in a way that seems to be desired by the sender in the perception of the participants. Gordon  
82 (1951) writes: ‘... if an individual, who is motivated to make socially acceptable responses, is forced to select one  
83 of the items as being least like himself, he will select the item that he perceives to be most derogatory ...’. This  
84 effect is very strong in the context of moralizing or ethical questions (Bou Malham & Saucier 2016) - in the context  
85 of the survey presented here, it is to be expected that the SDR effect is rather less pronounced. Nevertheless, since  
86 the sender of the survey discussed here identifies itself as a consortium with close ties to geoscientific research, it  
87 can be assumed that the survey participants are more likely to indicate a ‘high interest’ in a self-assessment (in  
88 the sense of ‘this seems to be expected by the sender’) than to respond with ‘no interest’. Based on this observation,  
89 responses indicating ‘no interest’ can be considered very robust and reliable, while responses indicating ‘high  
90 interest’ are less robust.

91 The Kruger-Dunning (in which one’s own competence is overestimated; Kruger & Dunning 1999) as well  
92 as the Imposter-Syndrome (assessing oneself as less competent than one actually is; Clance & Imes 1978), which  
93 counteracts this, cannot be determined here in terms of their effect and qualitative influence. In a critical  
94 interpretation of surveys such as the one presented here, however, both effects should always be taken into account.

## 95 3. Methodology

96 The raw data and the revised data (Schneider et al. 2024) discussed in the following chapters can be  
97 viewed and accessed via the Open Data LMU repository.

### 98 3.1 Sampling Methodology

99 The participants in the online survey were contacted via the e-mail distribution lis the participating  
100 partner institutions and the curatorial team’s professional and private e-mail distribution lists. It should be noted  
101 that the structures of these mailing lists resulted in a clear focus on people with an interest in geosciences and  
102 natural sciences or with a close connection with those communities. Although people without a high affinity for  
103 the natural sciences were also reached by approaching teachers and  students as well as by using private

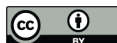

104 mailing lists, this fact must be taken into account when interpreting the data. Why the use of these mailing lists  
105 nevertheless makes sense is discussed in more detail in Chapter 5.

106 The survey was carried out using the online tool evasys. To test the structure, handling and validity of the  
107 survey, a test group consisting of around 35 participants was first asked to take part in the online survey. We took  
108 the constructive criticism expressed in this test run seriously and reformulated some of the questions in line with  
109 the feedback from the test group. An example of such an adaptation is the standardized formulation of the subject  
110 areas: based on the experience of the test run, the formulation was simplified without giving examples of topics  
111 and research object. As it turned out that only minor adjustments to the survey were necessary based on the  
112 criticism, the 35 participants in the test group were also included in the subsequent evaluation.

113 A rudimentary set of socio-demographic information was requested from all participants. This included  
114 information on the participants' age and gender, place of residence, profession and self-assessment of their prior  
115 knowledge of geoscientific topics. This was followed by a 5-point Likert scale to assess interest in 45 thematic  
116 fields.

117 This was followed by further open questions that asked about other topics, as well as expectations  
118 regarding exhibits or the exhibition infrastructure. The open questions allowed participants to indicate topics that  
119 they themselves found particularly interesting. Participants were also able to name topics that were not mentioned  
120 in the previous catalogue of topics, but which are of interest to them. The data on the infrastructure of an exhibition  
121 has not yet been included in the following analysis and will be examined in detail at a later date.

122 Answering the questions was voluntary, so participants could skip questions. Accordingly, the amount of  
123 valid data available varies from question to question.

### 124 3.2 Evaluation Methodology

125 In the following, we discuss the procedure for evaluating both the closed question types and the open  
126 questions. ~~It should be noted at this point that~~ multiple answers were possible in the interpretation of open questions  
127 with regard to the participants' socio-demographic information on their profession. For example, participants could  
128 identify themselves as students or teachers as well as academics. Accordingly, the information provided by these  
129 participants was integrated into both the cohorts of students and teachers as well as the cohort of academics.

#### 130 3.2.1 Likert scale rating - Topic catalogue

131 When evaluating the topics we provided, the survey participants were able to indicate their interest in  
132 each of these topics individually using a 5-point Likert scale. The answers could be rated from 'I am very  
133 interested' (with a rating of 1) to 'I am not interested at all' (with a rating of 5) as well as with more neutral ratings  
134 (I am somewhat interested, feel neutral, not very interested) in the middle (with a rating of 2 to 4) (Table 1). This  
135 is referred to below as the interest level and enables a quantitative evaluation based on the ordinal-scaled data,  
136 which allows a quick overview of the general and cohort-related interest in these topics.

---

| 5-step Likert Scale |                 |                     |         |                     |                       |
|---------------------|-----------------|---------------------|---------|---------------------|-----------------------|
| normative value     | very interested | somewhat interested | neutral | not very interested | not interested at all |

---



| operative value | 1 | 2 | 3 | 4 | 5 |
|-----------------|---|---|---|---|---|
|-----------------|---|---|---|---|---|

137

138 **Table 1: 5-point Likert scale using the example of the level of interest survey**

139

140 Some of the topics surveyed can be merged and summarized into generic topics. For example, the pre-  
 141 formulated topics Raw Materials, Formation of Deposits, and Raw Material on Site can be merged into the generic  
 142 topic of Raw Materials. This example already shows one of the obstacles of this survey.  The topics are not well  
 143 defined and might be perceived and interpreted by the survey participants in quite different ways. The introduction  
 144 of generic topics seeks to address this issue. In order to allow an analysis of these generic topics, mean values for  
 145 the level of interest in each of the integrated topics were calculated for each participant. This was done by  
 146 calculating the simple mean value, without any weight.  Only the valid values are included in this calculation.  
 147 The mean values calculated in this way can now be interpreted across or within the respective cohorts.

148 It is also interesting to analyse the standard deviations, which represent a measure of the spread of interest  
 149 in a topic. A low dispersion means that the participants in the survey show a more homogeneous indication of  
 150 interest in this topic than for a topic with a high dispersion. However, due to various social effects (see Chapter  
 151 2.1), these values can only be interpreted qualitatively.

152 **3.2.2 Open Questions**

153 In addition to the closed questions, the participants' interest and expectations were also evaluated using  
 154 open questions. These were primarily intended to identify topics that were not covered in the closed questions but  
 155 were nevertheless of great interest to the survey participants. The evaluation of the open questions section of the  
 156 survey is also important as it gives participants an additional chance to mention topics that they find particularly  
 157 interesting (including those that may have already been addressed previously). In order to analyse such open  
 158 questions, we used the established methods of Qualitative Content Analysis (QCA). For this purpose, a codebook  
 159 was created that translates free text answers into a numerical code. The codebook was developed jointly by the  
 160 people responsible for coding (coder) – a routine that results in a more reliable coding due to agree on terminology  
 161 and interpretation. A sample of the data set was first coded by coder A. Another sample with slight overlap to the  
 162 first sample was coded by coder B. Subsequently, a sample of the initial coding of A respectively B was coded  
 163 again by a third coder C, so that the validity of the coding could be checked. An analysis of these intercoder  
 164 reliabilities shows that there is very good to excellent reliability between the different coders (Table 2). This means  
 165 that subjective distortions due to individual interpretations of the elements of the coding book can be regarded as  
 166 very low.

| Intercoder-Reliability       |            |           |      |
|------------------------------|------------|-----------|------|
| Coder                        | A-C        | B-C       | B-C  |
| related question             | 8.1        | 8.3       | 8.2  |
| valid coding by both         | 106        | 53        | 76   |
| Cronbach's Alpha             | 0.79       | 0.96      | 0.85 |
| Cronbach's Alpha Consistency | acceptable | excellent | good |



167

168 **Table 2: Intercoder reliabilities between the three coders A, B and C. The reliability was checked for sample questions**  
169 **as mentions in row 2; (Dataset: visitors\_expectations\_openQ.csv)**

170 As part of the coding of the open questions, we were able to identify different levels of content (the so-  
171 called granularity). Accordingly, and similar to the above-mentioned procedure, generic topics were defined that  
172 summarize the answers of a topic area. For example, answers that mention sub-topics such as synthetic minerals,  
173 crystal structure or biomineralization are assigned to the generic topic of minerals and crystals.

174 It is crucial for the interpretation of the open questions that we mention here that multiple answers were  
175 permitted. This means that a participant could mention several topics in the open question, each of which was  
176 treated as a separate answer in the coding. In addition, some participants preferred not to answer open questions.  
177 The data set of 775 participants ultimately contains

178 • 393 topic-related items in the responses for question 8.1

179 • 249 topic-related items in the responses for Question 8.2

180 • 303 topic-related items in the responses for question 8.3.

181 The separate coding of multiple responses allows the content mentioned to be linked to socio-  
182 demographic data (in particular age and previous knowledge).

## 183 4. Results

### 184 4.1 Soz mographics

185 All participants were asked to provide socio-demographic information on the categories of age, gender,  
186 profession, place of residence and a self-assessment of their own previous knowledge. The question about the age  
187 of the participants was open (numerical answers only). The question about gender allowed for clear indications of  
188 male, female, diverse or no indication. The profession and place of residence were asked as checkboxes (e.g.  
189 residence was coded as Munich, Munich area, Bavaria, Germany, international).

#### 190 4.1.1. Age and Gender

191 The participant group is made up of 380 female and 380 male participants - three participants identified  
192 themselves as diverse, twelve preferred not to provide any information on their gender (11 participants responded  
193 with 'prefer not to answer'; one response showed an empty field). For a meaningful interpretation of possible  
194 correlations between age and level of interest, the respondents were grouped into cohorts, each covering 20 years.  
195 This results in four cohorts that allow certain trends to be identified.

196 The age distribution of the participants reflects the demographic data of the Federal Republic of Germany  
197 as far as the age groups over 20 are concerned. In contrast, the age groups between 21-40 years are more strongly  
198 represented in the survey, while the age group under and equal to 20 years is significantly weaker. 43 participants  
199 belong to the age cohort younger or equal to 20 years, 270 to the cohort 21-40 years, 260 to the cohort 41-60 years  
200 and 168 to the cohort 60+. 35 participants did not provide any information (Table 3). The age group under 15 was



201 represented by only one participant. This is partly due to the fact that the actual target group of the survey was  
 202 people over the age of 16, as younger people would have needed their parents' consent to take part in such a survey.  
 203 Obtaining this consent would not have been feasible in the selected online format.

| Age (n=775) | cohort | count | Percentage of valid entries | Gender (n=775) | cohort               | count | Percentage of valid entries |
|-------------|--------|-------|-----------------------------|----------------|----------------------|-------|-----------------------------|
| valid       | ≤ 20   | 43    | 5.5                         | valid          | prefer not to answer | 11    | 1.4                         |
|             | 21-40  | 270   | 34.8                        |                | Male                 | 380   | 49.1                        |
|             | 41-60  | 260   | 33.5                        |                | Female               | 380   | 49.1                        |
|             | >60    | 168   | 21.6                        |                | Diverse              | 3     | 0.4                         |
|             | none   | 35    | 4.5                         |                | empty field          | 1     |                             |

204 **Table 3: left: Distribution of respondents by age cohort; right: Distribution of respondents by gender**  
 205 **(Dataset: visitors-expectations.csv)**

206 **4.1.2. Profession**

207 Participants were asked to indicate one or more professions. Nine categories were specified: school  
 208 pupils, geoscience students, students of other subjects, scientists, museum staff, teachers, lecturers, people  
 209 interested in geosciences and other (Table 4).

210 These categories are not always very precise and clear-cut, which is why multiple answers were allowed  
 211 here. In addition, these categories are not further defined, which makes it difficult to analyse the statements on  
 212 thematic interest in relation to professions such as lecturer, geoscientifically interested or other. Similarly, the  
 213 assignment of participants to geoscience students, students of other subjects or the distinction between students  
 214 and teaching staff is not always clear.

| Profession                  | count | Percent of respondents |
|-----------------------------|-------|------------------------|
| Students (K12)              | 14    | 1.8%                   |
| Students Geoscience         | 102   | 13.2%                  |
| Students other              | 66    | 8.5%                   |
| Scientists                  | 204   | 26.3%                  |
| Museum Staff                | 89    | 11.5%                  |
| Teachers                    | 96    | 12.4%                  |
| Lecturers                   | 80    | 10.3%                  |
| Interested in Earth Science | 271   | 35.0%                  |
| others                      | 118   | 15.2%                  |

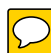

215  
 216 **Table 4: Distribution of respondents according to their own statements about their profession; multiple answers result**  
 217 **in 1040 responses from 775 participants (Dataset: visitors-expectations.csv)**

218 **4.1.3. Previous Knowledge**

219 The participants were asked to self-assess their competence in the geosciences. The question about prior  
 220 knowledge was answered on a 5-point Likert scale (Table 5).



221 Overall taking into account known effects in the empirical social sciences, it can be seen that  
 222 expected results are reproduced here and that clear tendencies are confirmed when comparing the different  
 223 professions. This becomes obvious, among other things, when comparing students of geosciences with students of  
 224 other subjects: here it can be clearly seen that although students of geosciences assess their prior knowledge as  
 225 only slightly above average, they are clearly above the values of students of other subjects. These observations  
 226 lead to the conclusion that the self-assessment of competence in the geosciences provides robust results.

| Profession and pre-existing Knowledge |                |       | <i>great knowledge</i> | <i>somewhat knowledgeable</i> | <i>neutral</i> | <i>not very knowledgeable</i> | <i>no knowledge at all</i> | <i>no data</i> |
|---------------------------------------|----------------|-------|------------------------|-------------------------------|----------------|-------------------------------|----------------------------|----------------|
| <b>Students (K12)</b>                 | <i>count</i>   | 0     | 0                      | 8                             | 3              | 2                             | 0                          |                |
|                                       | <i>percent</i> | 0.0%  | 0.0%                   | 61.5%                         | 23.1%          | 15.4%                         | 0.0%                       |                |
| <b>Students Geosciences</b>           | <i>count</i>   | 36    | 42                     | 18                            | 4              | 0                             | 0                          |                |
|                                       | <i>percent</i> | 35.5% | 41.2%                  | 17.6%                         | 39.0%          | 0.0%                          | 0.0%                       |                |
| <b>Students other</b>                 | <i>count</i>   | 7     | 10                     | 22                            | 20             | 7                             | 0                          |                |
|                                       | <i>percent</i> | 10.6% | 15.2%                  | 33.3%                         | 30.3%          | 10.6%                         | 0.0%                       |                |
| <b>Scientists</b>                     | <i>count</i>   | 127   | 37                     | 23                            | 10             | 6                             | 1                          |                |
|                                       | <i>percent</i> | 62.3% | 18.1%                  | 11.3%                         | 4.9%           | 2.9%                          | 0.5%                       |                |
| <b>Museum Staff</b>                   | <i>count</i>   | 32    | 14                     | 16                            | 19             | 8                             | 0                          |                |
|                                       | <i>percent</i> | 36.0% | 15.7%                  | 18.0%                         | 21.3%          | 9.0%                          | 0.0%                       |                |
| <b>Teachers</b>                       | <i>count</i>   | 38    | 22                     | 18                            | 11             | 7                             | 0                          |                |
|                                       | <i>percent</i> | 39.6% | 22.9%                  | 18.8%                         | 11.5%          | 7.3%                          | 0.0%                       |                |
| <b>Lecturers</b>                      | <i>count</i>   | 55    | 12                     | 6                             | 4              | 3                             | 0                          |                |
|                                       | <i>percent</i> | 68.8% | 15.0%                  | 7.5%                          | 5.0%           | 3.8%                          | 0.0%                       |                |
| <b>Interested in Geoscience</b>       | <i>count</i>   | 62    | 59                     | 102                           | 38             | 10                            | 0                          |                |
|                                       | <i>percent</i> | 22.9% | 21.8%                  | 37.6%                         | 14.0%          | 3.7%                          | 0.0%                       |                |
| <b>others</b>                         | <i>count</i>   | 7     | 9                      | 28                            | 54             | 20                            | 0                          |                |
|                                       | <i>percent</i> | 5.9%  | 7.6%                   | 23.7%                         | 45.8%          | 16.9%                         | 0.0%                       |                |

227

228 **Table 5: Correlation between profession and self-assessed prior knowledge of respondents**  
 229 (Dataset: visitors-expectations.csv)

230 The self-assessed level of interest of the museum employees is as follows: Here, we see the highest rate  
 231 of ‘great knowledge’ amongst all professions. An explanation for this could be found in the distribution process:  
 232 The distribution lists used for the survey are generally also strongly influenced by the networks of the concept  
 233 team employees – all of them involved in earth sciences themselves.

234 As employees from natural history museums and other museums are particularly involved here, a stronger  
 235 tendency towards a high level of knowledge amongst participants from this profession would have been expected.  
 236 The fact that around a third of respondents in this cohort (Museum Staff) describe themselves as having little to  
 237 no prior knowledge also seems unusual in respect to the option of multiple responses. In addition, a closer analysis  
 238 of this cohort shows that around half of the museum employees surveyed also classified themselves as geoscience  
 239 students or scientists. This indicates that the museum employees perceive themselves as uninformed - a possible  
 240 effect that could relate to the imposter syndrome (Clance & Imes 1978, for more recent research on the Imposter  
 241 Syndrome see Walker & Saklofske 2023).





242 **4.2. Evaluation of questions on predefined topics**

243 The evaluation of the closed topic survey (of the topics predefined within the survey) shows that some  
 244 topics are characterized by a high level of interest - other topics, ~~on the other hand,~~ are rated as less interesting by  
 245 the participants (Table 6). This initial analysis was carried out without differentiated consideration of the various  
 246 participant groups, but already reveals remarkable differences. For example, topics can already be identified here  
 247 that simplify initial contact in mediation. Topics that are highly relevant to everyday life (climate change, raw  
 248 materials, everyday relevance), spectacular geoscientific phenomena (volcanism, plate tectonics), but also certain  
 249 basic research topics (origin and development of life - keyword evolution) are met with a high level of interest. In  
 250 contrast, participants find a heterogeneous selection of topics less interesting (e.g. artificially produced crystals  
 251 and materials, biomineralization and raw materials on site).

| Descriptive Statistics        |     |      |         |
|-------------------------------|-----|------|---------|
|                               | N   | Mean | Std Dev |
| Methods and Instruments       | 771 | 1.92 | 0.90    |
| Social relevance              | 769 | 1.94 | 1.01    |
| Relevance for Everyday Life   | 769 | 1.61 | 0.76    |
| LMU and SNSB Topics           | 769 | 2.08 | 0.93    |
| Great Exhibits/Objects        | 768 | 1.94 | 0.89    |
| Regional Reference            | 770 | 1.96 | 1.02    |
| Interface to Other Sciences   | 770 | 2.04 | 1.05    |
| Fossils                       | 768 | 2.05 | 1.01    |
| Evolution of Life             | 773 | 1.77 | 0.90    |
| Mass-Extinction of Species    | 768 | 1.98 | 0.95    |
| Evolution of Plants           | 769 | 2.20 | 1.02    |
| Biomineralization             | 766 | 2.49 | 1.04    |
| Climate change                | 774 | 1.62 | 0.85    |
| Raw Materials                 | 770 | 1.83 | 0.93    |
| Satellites                    | 771 | 2.27 | 1.05    |
| Renewable Energies            | 772 | 2.04 | 1.04    |
| Radioactive Waste Disposal    | 772 | 2.23 | 1.06    |
| Natural Cycles                | 766 | 2.17 | 1.04    |
| Ocean                         | 771 | 1.98 | 1.01    |
| Structure of the Earth        | 773 | 1.79 | 0.81    |
| Chemistry of the Earth        | 772 | 2.08 | 0.99    |
| Planets                       | 773 | 1.95 | 0.96    |
| Solar System                  | 763 | 1.88 | 0.92    |
| Plate tectonics and Volcanism | 770 | 1.65 | 0.84    |
| Formation of Deposits         | 770 | 1.99 | 0.94    |
| Aesthetics of Minerals        | 767 | 2.28 | 1.12    |
| Building Materials            | 770 | 2.40 | 1.13    |
| Artificial Minerals           | 768 | 2.55 | 1.17    |
| The Alps                      | 774 | 1.82 | 0.87    |
| Volcanism in Bavaria          | 774 | 1.87 | 0.92    |
| Ries Crater                   | 773 | 1.93 | 0.95    |
| Franconian Jurassic           | 767 | 2.13 | 1.05    |
| Ancient elephant              | 768 | 2.20 | 1.10    |
| Raw Materials on Site         | 768 | 2.29 | 1.05    |
| Tsunamis                      | 768 | 2.21 | 1.01    |
| Landslides                    | 769 | 2.14 | 1.04    |
| Floods                        | 764 | 2.27 | 1.02    |
| Earthquakes                   | 767 | 1.95 | 0.92    |
| Meteorite Impacts             | 767 | 2.03 | 0.99    |
| Volcanism                     | 766 | 1.82 | 0.93    |
| Metamorphism of Rocks         | 773 | 2.05 | 1.01    |
| Magma                         | 773 | 1.86 | 0.91    |



|                        |     |      |      |
|------------------------|-----|------|------|
| Mountain Formation     | 769 | 1.88 | 0.89 |
| Salts Near the Surface | 769 | 2.15 | 0.99 |
| Erosion                | 770 | 2.01 | 0.97 |

252

253 **Table 6: Mean values of the interest level of the topics, arranged in the order of the query. N= number of valid**  
 254 **ratings; mean= statistical mean as the sum of the valid ratings divided by N; Std Dev = standard deviation; please**  
 255 **note that the highest interest is coded as 1, the lowest interest as 5 (see 3.2.1) - therefore a low mean value means that**  
 256 **the respondents rated this topic with high interest. N is the number of valid answers - as some participants did not**  
 257 **want to answer at all (empty field), N varies from topic to topic. (Dataset: visitors-expectations.csv)**

258 It is noticeable that topics rated with a high average interest tend to have a low standard deviation: the 10 topics  
 259 with mean values of less than 1.87 show standard deviations of 0.93 or less. In contrast, topics that were rated with  
 260 lower interest tend to show a higher standard deviation: the 10 topics with mean values above 2.2 show standard  
 261 deviations greater than 1.01 and up to 1.17. This indicates that topics with a lower average interest were rated very  
 262 differently in different groups (regardless of age, gender, profession or similar assignment to cohorts). At the same  
 263 time, this may also be related to the fact that, due to the tendency towards the middle, shifts towards average values  
 264 have taken place here, while the information on low interest can otherwise be regarded as rather robust. However,  
 265 this also results in a greater dispersion in the data itself - the standard deviation increases accordingly.

266 In a next step, the topics with a higher standard deviation were therefore analysed in more detail. The first step  
 267 was to compare the interest levels indicated by the professions of scientists, geoscience students, teachers, students  
 268 of other subjects and pupils. For the three topics with the lowest average interest (biomineralization, artificially  
 269 produced crystals and materials, structure and properties of minerals), scientists had the highest proportion of  
 270 participants who found these topics very interesting (Figure 1). In contrast, only a few teachers, students of other  
 271 subjects and school pupils (K12) find this content very interesting – significantly more respondents from these  
 272 professions consider these topics to be of little or no interest

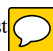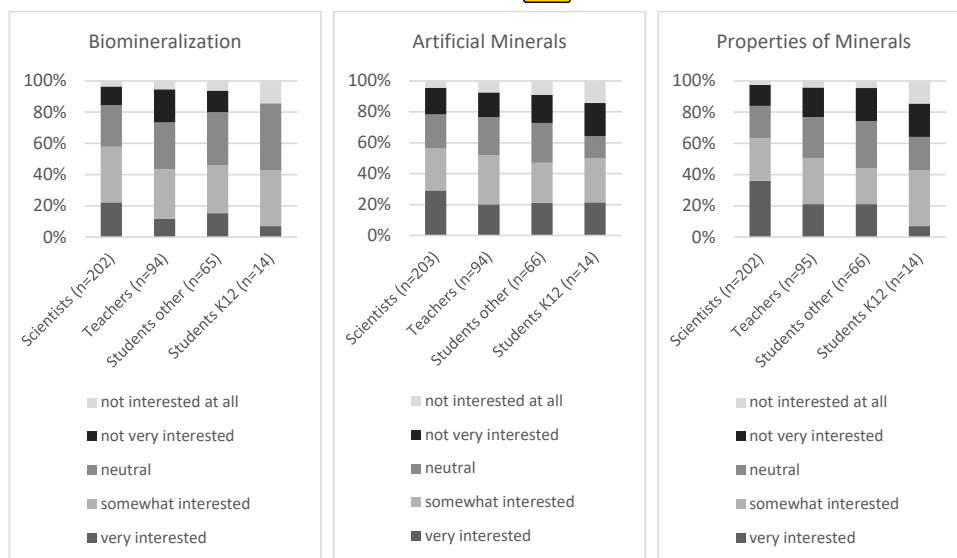

273

274 ■ very interested ■ somewhat interested ■ neutral ■ not very interested ■ not interested at all



275 **Figure 1: Comparison of the interest levels of scientists, teachers, students of other subjects and pupils (K12) on topics**  
 276 **with a higher spread of interest levels (Dataset: visitors-expectations.csv)**

277

278 The different interest levels of scientists and teachers are particularly striking in these topics and it is  
 279 noticeable that around 10% fewer teachers rate these topics as very interesting. At the same time, however, the  
 280 difference in the interest level ‘no interest’ is only very slight.

281 For comparison, the distribution of interests in the various professions was also analysed for topics with  
 282 a high level of interest and a low standard deviation. The example of climate change (in geological history and  
 283 today) shows that the level of interest here is quite high across all professions (Figure 2). Basically, it can be seen  
 284 that the groups of teachers and pupils in particular show a significant later interest in the topic of climate  
 285 change than the other groups. Only in the group of scientists and lecturers is there a small proportion of participants  
 286 who are not interested in this topic. However, in view of the low representativeness of the sample, it is not possible  
 287 to draw conclusions here about the often-cited climate change fatigue (Hornsey & Fielding 2020).

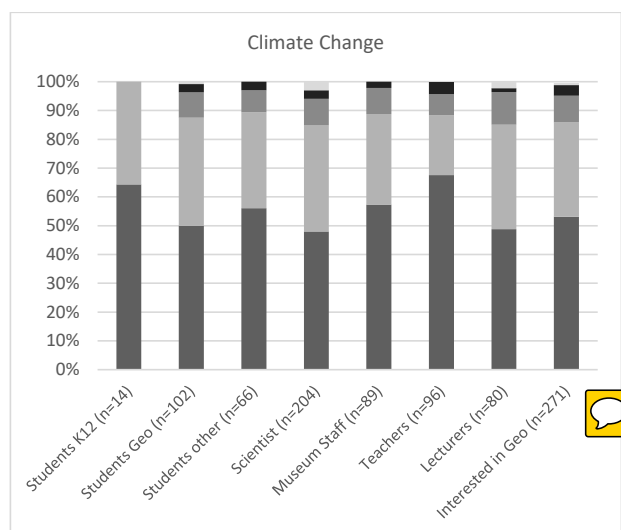

288

289 **Figure 2: Comparison of the interest levels of the various professions on the topic of climate change. It should be**  
 290 **noted once again that the ‘profession’ cohorts are not clearly defined, and multiple responses were permitted**  
 291 **(Dataset: visitors-expectations.csv)**

292 In addition to analysing different levels of interest between the professions, an analysis can also be carried  
 293 out in relation to the age of the participants. It can be seen that there are some strong differences between age  
 294 cohorts. Younger participants often rate the topics surveyed very differently to older cohorts. This is noticeable,  
 295 for example, in the generic topic area of raw materials: the topics ‘Raw Materials and their Formation and Deposits’  
 296 and ‘Regional raw material occurrence’ are rated as less interesting by the age cohort under 20 years (Figure 3).

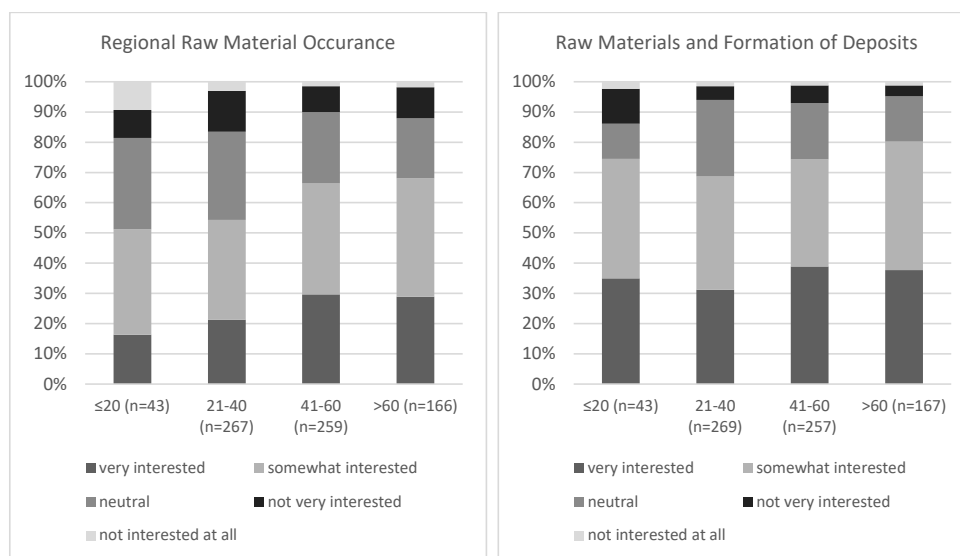

297

298 **Figure 3: Occurrence of interest in topics related to raw material – interest in the overall topic of raw materials**  
 299 **increases with age. (Dataset: visitors-expectations.csv)**

300 It is noticeable here that the topic with a stronger regional focus (Regional Raw Material Occurrence)  
 301 was rated as ‘Not interested at all’ and therefore significantly less interesting than the more basic topic (Raw  
 302 Materials and Formation of Deposits).

### 303 4.3 Results from open questions about additional expectations

304 The answers to the open question 8.1 ‘Are there any other topics/contents that you would like to see in  
 305 an exhibition about the geosciences?’ were divided into various sub themes using the codebook. Some sub-themes  
 306 were later merged into generic themes (see Chapter 3.2.2). When looking at the number of answers in the various  
 307 generic topics, it is noticeable that a very large proportion of the answers (37.0%, N=145) of the total of 392 coded  
 308 answers) fall into the generic topic of ‘Earth and Mankind’ (Table 7). The answers in the earth-environment-human  
 309 area are divided into 22 sub-topics, some of which coincide with the topics of the closed questions. However, there  
 310 are also some additional topics, which justifies the approach of using an open questionnaire in addition to a closed  
 311 questionnaire. The most frequently mentioned topics among the 22 sub-topics in the earth-human-environment  
 312 area were ‘Raw materials, reserves and prospection’, ‘Climate change’, ‘Geosciences in politics and society’,  
 313 ‘Species extinction - Anthropocene’, ‘Protection of landscape and environment’, ‘Drinking water’ and  
 314 ‘Geothermal energy/renewable energies’.

315 In the answers to this open question, some topics were also mentioned that go beyond the list of topics in  
 316 the closed questions. Among these, the sub-topics ‘Study and career in geosciences’, ‘Connection to other  
 317 disciplines’ and ‘History of science’ were mentioned more frequently.

318



|            | Structure and Dynamics of the Planet | Processes and Cycles | Crystals and Minerals | Earth Materials | Evolution | Regional Relevance | others |
|------------|--------------------------------------|----------------------|-----------------------|-----------------|-----------|--------------------|--------|
| Percentage | 7.9%                                 | 9.4%                 | 6.4%                  | 37.0%           | 5.9%      | 8.4%               | 27.8%  |
| n=392      | 31                                   | 37                   | 25                    | 145             | 23        | 33                 | 109    |

319

320 **Table 7: Number of mentions of generic topics in the open question 8.1 of the survey in relation to all open answers**  
 321 **given (Dataset: visitors-expectations\_openQ.csv)**

322 **5. Discussion**

323 **5.1. Socio-demographic trends in interest levels**

324 In the following, we will look at trends that can be identified by comparing the information on the  
 325 respective topic levels and the respective demographic data. Here, we focus primarily on a possible correlation  
 326 between interest level and age as well as interest level and prior knowledge. We will only briefly discuss possible  
 327 correlations between interest level and profession.

328 **5.1.1. Age and Interest Levels**

329 In general, it can be said that there is a high level of interest in the specified geosciences and  
 330 environmental sciences topics across all age groups. This becomes particularly obvious when asking about the  
 331 level of interest in the topic of climate change. Here, well over 87% of respondents in all age groups expressed  
 332 great to very great interest (Table 8). This finding speaks – even if one takes into account the particular composition  
 333 of the sample – against the climate change fatigue postulated by some studies (Kerr 2009, Hornsey & Fielding  
 334 2020, Hoppe & Neverla 2023).

| Age x Climate Change |                |                        |                            |                |                            |                              |
|----------------------|----------------|------------------------|----------------------------|----------------|----------------------------|------------------------------|
| Age                  |                | <i>very interested</i> | <i>somewhat interested</i> | <i>neutral</i> | <i>not very interested</i> | <i>not interested at all</i> |
| ≤20                  | <i>count</i>   | 28                     | 13                         | 2              | 0                          | 0                            |
|                      | <i>percent</i> | 65.1%                  | 30.2%                      | 4.7%           | 0.0%                       | 0.0%                         |
| 21-40                | <i>count</i>   | 145                    | 87                         | 24             | 9                          | 5                            |
|                      | <i>percent</i> | 53.7%                  | 32.2%                      | 8.9%           | 3.3%                       | 1.9%                         |
| 41-60                | <i>count</i>   | 145                    | 82                         | 22             | 7                          | 3                            |
|                      | <i>percent</i> | 56.0%                  | 31.7%                      | 8.5%           | 2.7%                       | 1.2%                         |
| >60                  | <i>count</i>   | 97                     | 53                         | 12             | 6                          | 0                            |
|                      | <i>percent</i> | 58.4%                  | 31.9%                      | 7.23%          | 3.61%                      | 0.0%                         |
| no answer            | <i>count</i>   | 13                     | 16                         | 3              | 1                          | 1                            |
|                      | <i>percent</i> | 38.2                   | 47.1                       | 8.8            | 2.9                        | 2.9                          |
| all                  | <i>count</i>   | 428                    | 251                        | 63             | 23                         | 9                            |
|                      | <i>percent</i> | 55.3%                  | 32.4%                      | 8.1%           | 3.0%                       | 1.2%                         |

335

336 **Table 8: Cross-tabulation of age and level of interest in climate change. (Dataset: visitors-expectations.csv)**

337 The analysis of the topic of ‘regional relevance’ shows that young people are less interested in the  
 338 frequently evoked regional relevance of a topic (Table 9). The regional reference, although generally rated as  
 339 interesting, is rated as uninteresting by an unusually large number of respondents in the under-20 age group. 21%  
 340 of those under 20 do not consider the regional reference to be interesting. In contrast, only 10.3% of respondents  
 341 across all age groups do not rate the regional reference as interesting.



342

| Age x Regional Relevance |         |                 |                     |         |                     |                       |
|--------------------------|---------|-----------------|---------------------|---------|---------------------|-----------------------|
| Age                      |         | very interested | somewhat interested | neutral | not very interested | not interested at all |
| ≤20                      | count   | 14              | 13                  | 7       | 9                   | 0                     |
|                          | percent | 32.6%           | 30.2%               | 16.3%   | 20.9%               | 0.0%                  |
| 21-40                    | count   | 82              | 84                  | 65      | 35                  | 3                     |
|                          | percent | 30.5%           | 31.2%               | 24.2%   | 13.0%               | 1.2%                  |
| 41-60                    | count   | 120             | 81                  | 34      | 21                  | 3                     |
|                          | percent | 46.3%           | 31.3%               | 13.1%   | 8.1%                | 1.2%                  |
| >60                      | count   | 84              | 62                  | 13      | 5                   | 2                     |
|                          | percent | 50.6%           | 37.4%               | 7.8%    | 3.0%                | 1.2%                  |
| No answer                | Count   | 19              | 10                  | 3       | 0                   | 1                     |
|                          | Percent | 57.6%           | 30.3%               | 9.1%    | 0.0%                | 3.0%                  |
| all                      | count   | 319             | 250                 | 122     | 70                  | 9                     |
|                          | percent | 41.4%           | 32.5%               | 15.8%   | 9.1%                | 1.2%                  |

343

344 **Table 9: Cross-tabulation of age and level of interest regional reference. (Dataset: visitors-expectations.csv)**

345 This observation suggests that younger age cohorts, who are shaped by globalization and a humanity that  
 346 increasingly describes itself as a global society, attach less importance to regional issues. However, as the example  
 347 of climate change shows, they are interested in issues relating to global challenges. This observation is important  
 348 as it allows a more targeted approach to certain age cohorts. According to the example discussed here, young target  
 349 groups can be reached less effectively via the regional relevance of a topic. Rather, the need for information, which  
 350 is expressed by a high level of interest, should be addressed in a targeted manner in order to then allow possible  
 351 follow-up communication on other topics. However, as we will discuss in more detail below, this consideration  
 352 only applies to the so-called initial contact.

353 **5.1.2. Correlation between interest in generic topics and prior knowledge**

354 With the help of the correlation analysis between the variables of prior knowledge and the generic topics  
 355 (see Chapters 3.2.1 and 3.2.2) taken from question 8.1, it is possible to draw certain conclusions about the level of  
 356 interest in certain topics if pre-educated target groups are to be addressed. The construct of prior knowledge was  
 357 defined in the survey itself as ‘prior knowledge in the geosciences’. For most topics, it can be seen that interest  
 358 increases when respondents rate themselves as having a higher level of prior knowledge (Table 10).

|                                                            | Structure and Dynamics of the Planet | Processes and Cycles | Crystals and Minerals | Earth and Mankind | Evolution | Regional Relevance | Others |
|------------------------------------------------------------|--------------------------------------|----------------------|-----------------------|-------------------|-----------|--------------------|--------|
| Pearson Correlation r in Respect to Pre-existing Knowledge | 0.210                                | 0.076                | 0.224                 | 0.029             | -0.039    | 0.189              | 0.019  |

359

360 **Table 10: Correlation between self-assessed prior knowledge and interest in the main topics – A positive r value**  
 361 **(Pearson Correlation) higher than 0.05 means that interest in the corresponding topics increases with more prior**  
 362 **knowledge. A negative r shows that interest in a topic decreases with more prior knowledge. (Dataset: visitors-**  
 363 **expectations\_openQ.csv)**



364            However, the topic of evolution is an exception here: the negative correlation indicates that respondents  
365 who state a higher level of prior knowledge are less interested in topics relating to evolution. Current studies show  
366 that religion and belief may play an important role in the level of interest in this topic area (Kuschmierz et al 2021,  
367 Gefaeli et al 2020).

368            The topic of the structure and dynamics of the Earth shows a moderate positive correlation between prior  
369 knowledge and interest. This may be due to the fact that the complexity and interdependence of various processes  
370 and structures in the Earth's interior can only be recognized with prior knowledge, while the perception of these  
371 dynamics is only weakly pronounced with only little prior knowledge. In other words, it seems to be the case that  
372 a complex topic only becomes more attractive with a certain level of prior knowledge.

### 373 **5.1.3. Correlation between interest in topics and profession**

374            The detailed analysis of the three topics with the lowest average interest (biomineralization, artificially  
375 produced crystals and materials, structure and properties of minerals) in respect to the level of interest of different  
376 professions can be a starting point for targeting certain professional cohorts. Teachers, for example, show the  
377 greatest interest in topics that are anchored in the school curriculum. On the other hand, topics that are considered  
378 particularly interesting by scientists, for example, but are not represented in the curriculum, are rated as less  
379 interesting by teachers. In order to specifically address the target group of teachers, the curricula must be addressed  
380 in the content of an exhibition or accompanying programs.

381            The slightly lower level of interest in the topic of climate change among geoscience students, geoscientists  
382 and lecturers is possibly due to the fact that the topic is dealt with on a daily basis anyway. Climate change and  
383 the observation of its effects are currently the main driver of many scientific studies in the earth and environmental  
384 sciences. Conversely, however, this does not mean that geoscience students, scientists and lecturers are not  
385 interested in the topic of climate change.

### 386 **5.2. Methodological criticism**

387            Unfortunately, no socio-economic classification of the participants was asked in the survey. However,  
388 this proved to be valuable additional information in the interpretation of the data, which we would like to take up  
389 again at a later date.

390            A further problem arose due to the different operationalization of equally important questions in the  
391 survey instrument. For example, questions were used that were operationalized via Likert-scaled answers on the  
392 one hand and binary yes-no answers on the other. A transfer had been made here. We were aware, that this  
393 transformation can be seen as a source of error and was therefore carried out with the utmost care.

#### 394 **5.2.1 Considerations regarding the composition of the sample**

395            As part of several concept workshops, the GeoForum concept team defined a series of stakeholder groups,  
396 which essentially comprised the following communities:

- 397            - Geoscientific researchers
- 398            - Humanities researchers and artists
- 399            - Teachers, especially in the natural sciences
- 400            - Students and potential future students
- 401            - Decision-makers from university management and (education and science) policy

402



403 As there are numerous overlaps here with previous and current activities of the members of the concept  
404 team, it seems sensible and efficient to use existing distribution lists. Among other things, this also helps to ensure  
405 that the results of the survey can be incorporated into the exhibition and program design in a targeted manner and  
406 with minimal loss of impact, both on the part of the participants and the subsequent integration of the survey  
407 results. As already described in Chapters 3.1. and 4.1., the use of existing distribution lists ensured that the  
408 composition of the sample (the survey participants) represented the GeoForum's target groups very well. Only the  
409 future students (pupils) are underrepresented (or absent). One of the reasons for this is that we have to consider  
410 the legal hurdles for surveys with minors, as well as the difficulty of reaching children and young people at all if  
411 we do not want to rely on the cooperation of schools. Although the interests of this target group in geosciences  
412 and environmental sciences are of great interest, we have decided not to approach schools. The 'non-visitors'  
413 represent another, equally interesting target group. However, it is almost impossible to reach them with surveys  
414 on the conceptual content of exhibitions and can generally only be achieved through direct interviews.

## 415 6. Conclusion

416 The analysis of the interest level of potential exhibition visitors shows that ~~very~~-different groups can be  
417 addressed by the range of topics on offer. However, it also seems advisable to communicate topics that are  
418 initially rated as less interesting in a targeted manner so that potential interest can develop in the first place.

419 High levels of participant interest in a topic make it possible to generate attention by addressing these  
420 topics and to directly address the expectations of the participants. These topics are therefore particularly suitable  
421 for initiating initial contact. Once this initial contact has been made, further topics can be set which are  
422 characterized, for example, by the potential for provocation (~~in a positive sense~~, see Ham 2007) or discussion. At  
423 the same time, the assessment of some topics as less interesting is much more difficult to interpret. In our  
424 opinion, the participants in the survey perceive certain topics as not interesting if they have little knowledge  
425 about these topics. For example, if the topic of biomineralization has been communicated little or inefficiently in  
426 advance (e.g. if it is barely present in traditional media), this can be interpreted as a lower level of interest.  
427 However, if a topic is presented in an active, entertaining and informative way in the media, the interesting facets  
428 and aspects of this topic become clear and interest in these topics increases.

429 In the exhibition design, which is ultimately the basis of this survey, this means that topics cannot be  
430 excluded in principle. However, there is actually a thematic sequence that can be used to develop contact with  
431 visitors from initial contact through establishing dialog to provocation and genuine follow-up communication.  
432 This contact hierarchy initially provides for addressing the audience on topics that are already characterized by a  
433 high level of interest. Further topics can then be placed and thus interest can be aroused. This step can be  
434 summarized with the quote 'Put there just a spark. If there is some good inflammable stuff, it will catch fire',  
435 which is attributed to the French Nobel Prize winner Anatole France. Once the audience's interest has been  
436 aroused, the provocation, in the sense of stimulating their own critical reflections on a topic, can finally take  
437 place (Mullin & Barr 2019).

438 In this sense, it is interesting – as an example for other topics such as Artificial Minerals, Radioactive  
439 Waste Disposal, or Biomineralization – to look at the relationship between age groups and interest in the topic of  
440 'satellite remote sensing' (Table 11). 'Satellite remote sensing' can serve as an example of a topic that is highly





441 relevant in everyday life (e.g. in respect to navigation, communication, early warning, etc.) but is still perceived  
 442 as rather uninteresting amongst the survey participants with 12.8% grading this topic as not very or not at all  
 443 interested. This shows that although there is a fundamental interest in this topic, only around a quarter of  
 444 respondents consider observing the Earth with satellites to be particularly interesting.

| Age x Satellite Remote Sensing |                |                        |                            |                |                            |                              |
|--------------------------------|----------------|------------------------|----------------------------|----------------|----------------------------|------------------------------|
| Age                            |                | <i>very interested</i> | <i>somewhat interested</i> | <i>neutral</i> | <i>not very interested</i> | <i>not interested at all</i> |
| ≤20                            | <i>count</i>   | 15                     | 15                         | 8              | 4                          | 1                            |
|                                | <i>percent</i> | 34.9%                  | 34.9%                      | 18.6%          | 9.3%                       | 2.30%                        |
| 21-40                          | <i>count</i>   | 74                     | 88                         | 67             | 29                         | 12                           |
|                                | <i>percent</i> | 27.4%                  | 32.6%                      | 24.8%          | 10.7%                      | 4.4%                         |
| 41-60                          | <i>count</i>   | 65                     | 93                         | 73             | 22                         | 6                            |
|                                | <i>percent</i> | 25.1%                  | 35.9%                      | 28.2%          | 8.5%                       | 2.3%                         |
| >60                            | <i>count</i>   | 41                     | 66                         | 43             | 14                         | 1                            |
|                                | <i>percent</i> | 24.8%                  | 40.0%                      | 26.1%          | 8.5%                       | 0.6%                         |
| No answers                     | <i>Count</i>   | 12                     | 10                         | 2              | 9                          | 1                            |
|                                | <i>Percent</i> | 35.3                   | 29.4                       | 5.9            | 26.5                       | 2.9                          |
| all                            | <i>count</i>   | 207                    | 272                        | 193            | 78                         | 21                           |
|                                | <i>percent</i> | 26.8%                  | 35.3%                      | 25.0%          | 10.1%                      | 2.7%                         |

445

446 **Table 11: Cross-tabulation of age and level of interest in satellite remote sensing. (Dataset: visitors-expectations.csv)**

447 If we compare this data with observations around exhibitions on this topic, a discrepancy emerges  
 448 between theoretical queries and real interest during corresponding communication measures. In exhibitions,  
 449 conversations and other communication measures, a great deal of interest in this topic area can be seen – but  
 450 always when concrete communication takes place. In such situations, even people who had little interest in  
 451 satellite remote sensing beforehand can be enthused about the topic.

452 One conclusion is that prior knowledge of the topic of satellite remote sensing may not be sufficient to  
 453 arouse intrinsic interest. If respondents know little about the benefits, technology or methods used in remote  
 454 sensing, the aforementioned proverbial spark for this topic cannot be ignited. However, if the interviewees are in  
 455 the middle of a dialog, an exchange on the topic, aesthetic images, innovative technologies and the numerous  
 456 applications relevant to everyday life as well as other factors arouse this interest. If one follows the theory that a  
 457 possible lack of or insufficient prior knowledge strongly influences the level of interest in a topic, this has a  
 458 formative influence on the conception of new science communication measures. For example, it is then urgently  
 459 necessary to make certain topics of high relevance to everyday life, but which turn out to be of little interest in  
 460 surveys, better and more intensively the content of new measures (see also Stewart & Lewis 2017). A low level  
 461 of interest in studies such as this one should then become the starting point for new communication.

462 The data collected in this survey allows for further multivariate analyses. For example, a detailed  
 463 investigation of a possible correlation of interests between subject areas and a detailed analysis of age structures  
 464 within the professions is still pending. However, both can provide additional insights into possible approaches to  
 465 target group-specific attention generation.



466 **Data Availability**

467 The data sets used for this study are published at Open Data LMU repository (Schneider et al. 2024).

468 **Author contribution**

469 GS, MKE, MK and LS designed the survey. LS and SS implemented the survey in the online-tool and  
470 accompanied the test phase as well as the actual survey. SS, LS and MJ checked the incoming responses, corrected  
471 the data for incorrect and incomplete data sets. LS, MJ and SS coded the answers. SS compiled the analysis, which  
472 was checked by LS and MJ. All authors did extensive editing of the final manuscript.

473

474 **Competing Interests**

475 The authors declare that they have no conflict of interest.

476 **Ethical Statement**

477 The authors are aware that on the basis of the correlations described in this article and in particular the  
478 selection processes described, conclusions can be drawn to a limited extent about the group of survey  
479 participants. However, as the survey was completely anonymized and no personal information was collected that  
480 could lead to the identification of the participants, we see no ethical concerns in the analysis of the survey  
481 results.

482 **Acknowledgement**

483 The data sets used for this study are published at Open Data LMU repository (Schneider et al. 2024).

484 The authors would like to expressly thank all participants in the survey. In addition, we are very grateful  
485 for the help of Dr. Marlene S. Altenmüller (Faculty of Psychology and Educational Sciences, LMU), who greatly  
486 improved the design of the survey with her experience in surveys. An intensive discussion about the structure of  
487 the survey took place in the concept team of the GeoForum Munich, so that we would like to dedicate our thanks  
488 to Dr. Markus Moser, Dr. Martin Nose and Dr. Annkathrin Baumann.

489 The GeoForum concept team is funded by the Bavarian State Natural History Collections (SNSB) and  
490 the Department of Earth and Environmental Sciences at Ludwig-Maximilians-Universität München (LMU).

491 **References**

- 492 Bernardi, R. A., & Nash, J. (2023). The importance and efficacy of controlling for social desirability response bias.  
493 *Ethics & Behavior*, 33(5): 413–429. doi:10.1080/10508422.2022.2093201
- 494 Bou Malham, P. & Saucier, G. (2016). The conceptual link between social desirability and cultural normativity.  
495 *Int J Psychol*, 51: 474–480. doi:10.1002/ijop.12261
- 496 Clance, P. R., & Imes, S. A. (1978). The imposter phenomenon in high achieving women: Dynamics and  
497 therapeutic intervention. *Psychotherapy: Theory, Research & Practice*, 15(3): 241–247. doi:10.1037/h0086006
- 498 Deutscher Museumsbund (DMB) (2006). Standards für Museen. Abgerufen im Feb 2022 unter  
499 <https://www.museumsbund.de/wp-content/uploads/2017/03/standards-fuer-museen-2006-1.pdf>
- 500 Gefaell, J., Prieto, T., Abdelaziz, M., Álvarez, I., Antón, J., Arroyo, J., Bella, J. L., Botella, M., Bugallo, A.,  
501 Claramonte, V., Gijón, J., Lizarte, E., Maroto, R. M., Megías, M., Milá, B., Ramón, C., Vila, M. & Rolán-Alvarez,

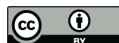

- 502 E. (2020). Acceptance and knowledge of evolutionary theory among third-year university students in Spain. *PLoS*  
503 *One*. doi: 10.1371/journal.pone.0238345.
- 504 Gordon, L. V. (1951). Validities of the forced-choice and questionnaire methods of personality measurement.  
505 *Journal of Applied Psychology*, 35(6): 407–412. doi:10.1037/h0058853
- 506 Ham, S. H. (2007). Can Interpretation Really Make a Difference? Answers to Four Questions from Cognitive and  
507 Behavioral Psychology. Interpreting World Heritage Conference, Vancouver, Canada, March 25, 2007.  
508 Proceedings, 42-52., retrieved April 2024 from: [https://interpat.mx/wp-content/uploads/2020/05/Cal-](https://interpat.mx/wp-content/uploads/2020/05/Cal-Interpretation-Really_SH2007.pdf)  
509 [Interpretation-Really\\_SH2007.pdf](https://interpat.mx/wp-content/uploads/2020/05/Cal-Interpretation-Really_SH2007.pdf)
- 510 Hollingworth, H. L. (1910). The central tendency of judgment. *The Journal of Philosophy, Psychology and*  
511 *Scientific Methods*, 7: 461–469
- 512 Hood, M. G. (1983). Staying away: why people choose not to visit museums. *Museum News*, 61(4):50-57
- 513 Hoppe, I. & Neverla, I. (2023). Klimawandel und Biodiversität: Was zeigt das Fernsehen? Was wollen die  
514 Zuschauer?. malisa-Stiftung. Retrieved May 2024 from [https://malisastiftung.org/wp-](https://malisastiftung.org/wp-content/uploads/KlimaBiodivImTV_Studie_24.10.23.pdf)  
515 [content/uploads/KlimaBiodivImTV\\_Studie\\_24.10.23.pdf](https://malisastiftung.org/wp-content/uploads/KlimaBiodivImTV_Studie_24.10.23.pdf)
- 516 Hornsey, M.J. & Fielding, K.S. (2020). Understanding (and Reducing) Inaction on Climate Change. *Social Issues*  
517 *and Policy Review*, 14: 3-35. doi:10.1111/sipr.12058
- 518 Kerr., R. A. (2009). Amid Worrisome Signs of Warming, 'Climate Fatigue' Sets In. *Science* 326: 926-928.  
519 doi:10.1126/science.326.5955.92610.1126/science.326.5955.926
- 520 Kirchberg, V. (2016). Gesellschaftliche Funktionen von Museen im Zeichen sozialer Verantwortung. In *Handbuch*  
521 *Museum*, 300-304. JB Metzler, Stuttgart
- 522 Kruger, J. & Dunning, D. (1999). Unskilled and unaware of it: How difficulties in recognizing one's own  
523 incompetence lead to inflated self-assessments. *Journal of Personality and Social Psychology*, 77(6): 1121–1134.  
524 doi:10.1037/0022-3514.77.6.1121
- 525 Kuschmierz, P., Beniermann, A., Bergmann, A. et al. (2021). European first-year university students accept  
526 evolution but lack substantial knowledge about it: a standardized European cross-country assessment. *Evo Edu*  
527 *Outreach*, 14(17) doi:10.1186/s12052-021-00158-8
- 528 Lippmann, W. (1998). *Public Opinion*. 2nd Edition with a new Introduction by Michael Curtis. Transaction  
529 Publishers. ISBN:1-56000-999-3
- 530 Liu, W. C. (2008). Visitor study and operational development of museums. *Museology Quarterly*, 22(3), 21e37
- 531 Mullin, T., & Barr, J. (2019). Sharing Multiple Missions of You – Land Trust Through Interpretive Messaging.  
532 Presentation at the Massachusetts Land Conversation Conference. Retrieved April 2024 from  
533 [https://massland.org/sites/default/files/files/3c\\_presentation.pdf](https://massland.org/sites/default/files/files/3c_presentation.pdf)
- 534 Sheng, C.-W. & Chen M.-C. (2012). A Study of Experience expectations of Museum Visitors. *Tourism*  
535 *Management* 33:53-60. doi:10.1016/j.tourman.2011.01.023
- 536 Schnell, R., Hill, P. B. & Esser, E. (2011) *Methoden der empirischen Sozialforschung*. 9. Auflage, Oldenbourg  
537 Wissenschaftsverlag. ISBN: 978-3-486-59106-4
- 538 Schneider, S., Seybold, L. , Simon, G., Kölbl-Ebert, M., Kaliwoda, M. & Junge, M. (2024). Evaluating  
539 Expectations on Museum Communication about Geo- and Environmental Sciences - Survey Data. August 2024.  
540 Open Data LMU. 10.5282/ubm/data.526



- 541 Stewart, I. S. & Lewis, D. (2017). Communicating contested geoscience to the public: Moving from ‘matters of  
542 fact’ to ‘matters of concern’, *Earth-Science Reviews*, 174:122-133, doi:10.1016/j.earscirev.2017.09.003.
- 543 Thiemeyer, T. (2016). Das Museum als Wissens- und Repräsentationsraum. In: M. Walz (Ed.), *Handbuch*  
544 *Museum*, doi:10.1007/978-3-476-05184-4\_4.
- 545 Walker, D. L., & Saklofske, D. H. (2023). Development, Factor Structure, and Psychometric Validation of the  
546 Impostor Phenomenon Assessment: A Novel Assessment of Impostor Phenomenon. *Assessment*, 30(7): 2162-  
547 2183. doi:10.1177/10731911221141870.
- 548 Xiang, Y., Graeber, T., Enke, B. & Gershman, S. J. (2021). Confidence and central tendency in perceptual  
549 judgment. *Atten Percept Psychophys* 83:3024–3034. doi:10.3758/s13414-021-02300-6
- 550
